# Supplementary material for: Differentially expressed full-length, fusion and novel isoforms transcripts-based signature of well-differentiated keratinized oral squamous cell carcinoma
Source: PubMed Central journal article supplement (PMC7456611; doi:10.18632/oncotarget.27693), 2020-08-25
Supplement: oncotarget-11-3227-s001.pdf [file oncotarget-11-3227-s001.pdf]

# Differentially expressed full-length, fusion and novel isoforms transcripts-based signature of well-differentiated keratinized oral squamous cell carcinoma

## SUPPLEMENTARY MATERIALS

### A

(i)

CLUSTAL O(1.2.4) multiple sequence alignment

```

IL37_Ref      MSFVGENSGVKMGSEDEWEKDEPQCCELEDPAGSPLPGLPTMNFVHTSPKVKNLNPKKF      60
IL37_OT      MSFVGENSGVKMGSEDEWEKDEPQCCELEDPVAVSPLPGLPAMNFVHTSPKVKNLNPKKF      60
*****
*****:*****

IL37_Ref      SIHQDQDHKVLVLDSDGNLIAVPDKNYIRPEIFFALASSLSSASAEGKSPILLGVSKGEFCL      120
IL37_OT      SIHQDQDHKVLVLDSDGNLIAVPDKNYIRPEIFFALASSLSSASAEGKSPILLGVSKGEFCL      120
*****

IL37_Ref      YCDKDKGQSHPSLQLKKEKLMKLAQKESARRPFI FYRAQVGSWNMLESAAHPGWFICTS      180
IL37_OT      YCDKDKGQSHPSLQLKKEKLMKLAQKESARRPFI FYRAQVGSWNMLESAAHPGWFICTS      180
*****

IL37_Ref      CNCNEPVGVTDFENRKHIEFSFQPVCKAEMSPSEVSD      218
IL37_OT      CNCNEPVGVTDFENRKHIEFSFQPVCKAEMSPSEVSD      218
*****
    
```

Ref: IL-37

(ii)

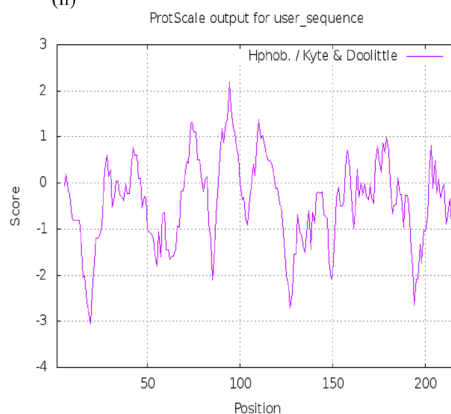

OT: IL-37

(iii)

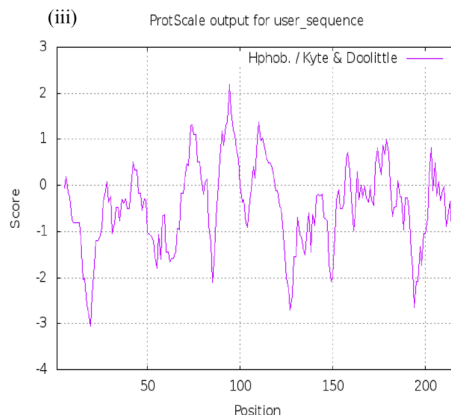

**B**

(i)  
 CLUSTAL O(1.2.4) multiple sequence alignment

```

RAB24_Ref      MSGQRVDVKVVMLGKEYVVGKTSLVERYVHDRFLVGPYQNTIGAAFVAKVMSVGDRTVTLG 60
RAB24_OC       MSGQRVDVKVVMLGKEYVVGKTSLVERYVHDRFLVGPYQNTIGAAFVAKVMSVGDRTVTLG 60
RAB24_OT       -----MSVGDRTVTLG 11
                                     *****

RAB24_Ref      IWDTAGSERYEAMSRIYYRGAKAAIVCYDLTDSSSFERAKFVVKELRSLEEGCQIYLCGT 120
RAB24_OC       IWDTAGSERYEAMSRIYYRGAKAAIVCYDLTDSSSFERAKFVVKELRSLEEGCQIYLCGT 120
RAB24_OT       IWDTAGSERYEAMSRIYYRGAKAAIVCYDLTDSSSFERAKFVVKELRSLEEGCQIYLCGT 71
                                     *****

RAB24_Ref      KSDLLEEDRRRRRVDFHDVQDYADNIKAQLFETSSKTGQSVDELFOKVAEDYVSVAAFQV 180
RAB24_OC       KSDLLEEDRRRRRVDFHDVQDYADNIKAQLFETSSKTGQSVDELFOKVAEDYVSVAAFQV 180
RAB24_OT       KSDLLEEDRRRRRVDFHDVQDYADNIKAQLFETSSKTGQSVDELFOKVAEDYVSVAAFQV 131
                                     *****

RAB24_Ref      MTEDKGVDLGQKPNPYFYSCCHH      203
RAB24_OC       MTEDKGVDLGQKPNPYFYSCCHH      203
RAB24_OT       MTEDKGVDLGQKPNPYFYSCCHH      154
                                     *****
  
```

Ref: RAB24

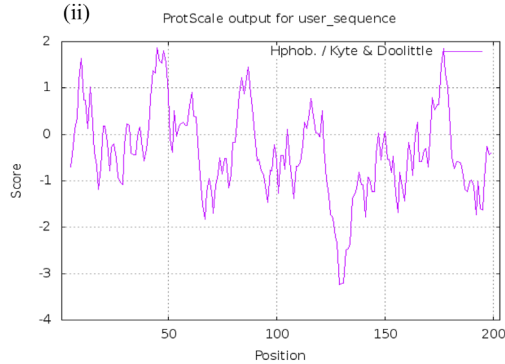

OC: RAB24

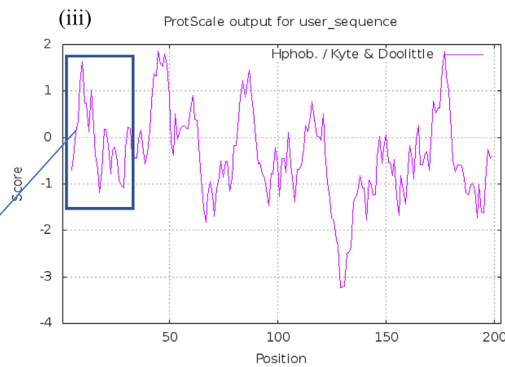

(Deleted Amino Acid sequence in OT)  
 MSGQRVDVKVVMLGKEYVVGKTS  
 LVERYVHDRFLVGPYQNTIGAAF  
 -----

OT: RAB24

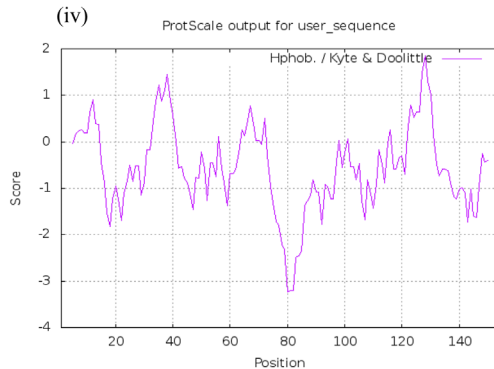

C

(i)

CLUSTAL O(1.2.4) multiple sequence alignment

```

NAA10_Ref      -----MNIRN----- 5
NAA10_OC       -----MNIR----- 4
NAA10_OT       MSGLRWVSGDLRGAHSCSCAPGVVQSQIVTVPAQPRGRGPSRPTGSRLLTRGHRRRLS 60

NAA10_Ref      -----ARPEDLMNMQHCNLLCLPENYQMKYYFYHGLSWPQLSYIAEDENGKIVGE--- 55
NAA10_OC       -----NARPEDLMNMQHCNLLCLPENYQMKYYFYHGLSWPQLSYIAEDENGKIVGYVLA 58
NAA10_OT       AFHCPPSLQPEDLMNMQHCNLLCLPENYQMKYYFYHGLSWPQLSYIAEDENGKIVGYVLA 120
                *****

NAA10_Ref      ---EDPDDVPHGHITSLAVKRSHRRLGLAQKLMQASRAMIENFNAKYVSLHVRKSNRAA 112
NAA10_OT       KMEEDPDDVPHGHITSLAVKRSHRRLGLAQKLMQASRAMIENFNAKYVSLHVRKSNRAA 180
NAA10_OC       KMEEDPDDVPHGHITSLAVKRSHRRLGLAQKLMQASRAMIENFNAKYVSLHVRKSNRAA 118
                *****

NAA10_Ref      LHLYSNTLNFQISEVEPKYYADGEDAYAMKRDLTQMADELRRHLELKEKGRHVVLGAIEN 172
NAA10_OT       LHLYSNTLNFQISEVEPKYYADGEDAYAMKRDLTQMADELRRHLELKEKGRHVVLGAIEN 240
NAA10_OC       LHLYSNTLNFQISEVEPKYYADGEDAYAMKRDLTQMADELRRHLELKEKGRHVVLGAIEN 178
                *****

NAA10_Ref      KVESKGNPPSSGEACREEKGLAAEDSGGDSKDLSEVSETTESTDVKDSSEASDSAS 229
NAA10_OT       KVESKGNPPSSGEACREEKGLAAEDSGGDSKDLSEVSETTESTDVKDSSEASDSAS 297
NAA10_OC       KVESKGNPPSSGEACREEKGLAAEDSGGDSKDLSEVSETTESTDVKDSSEASDSAS 235
                *****
    
```

Ref: NAA10

(ii) ProtScale output for user\_sequence

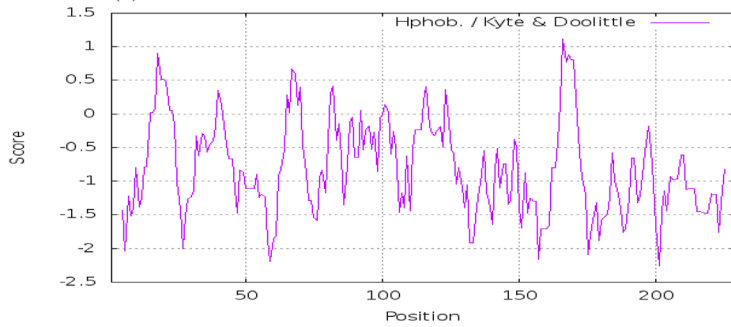

OC: NAA10

(iii) ProtScale output for user\_sequence

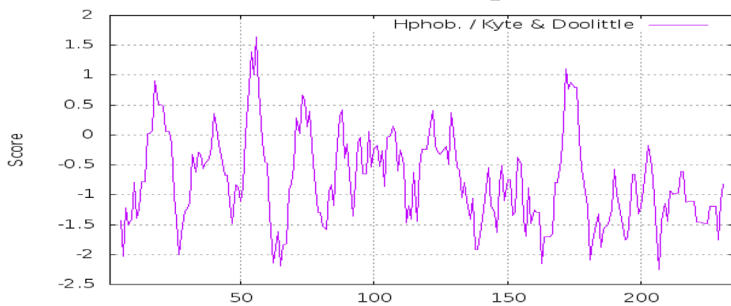

OT: NAA10

(iv) ProtScale output for user\_sequence

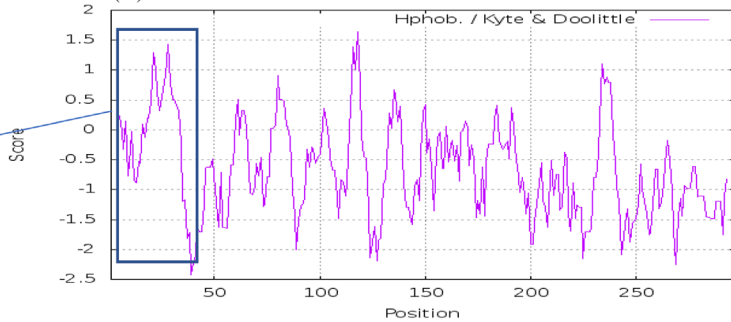

(Inserted Amino Acid  
sequence in OT)

```

MSGLRWVSGDLRGAHSCSCAPGVVQSQ
IVTVPAQPRGRGPSRPTGSRLLTRGHRR
    
```

**D**

(i)  
 CLUSTAL O(1.2.4) multiple sequence alignment

```

SPAG7_OT      MADLLGSILSSMEKPPSLGDQETRRKAREQAARLKKLQEQEKQQKVEFRKRMEKEVSDFI      60
SPAG7_OC      MADLLGSILSSMEKPPSLGDQETRRKAREQAARLKKLQEQEKQQKVEFRKRMEKEVSDFI      60
SPAG7_Ref     MADLLGSILSSMEKPPSLGDQETRRKAREQAARLKKLQEQEKQQKVEFRKRMEKEVSDFI      60
*****

SPAG7_OT      QDSGQIKKKFQPMNKIERSILHDVVEVAGLTSFSFGEDDDCRYVMIFKKEFAPSDEELDS      120
SPAG7_OC      QDSGQIKKKFQPMNKIERSILHDVVEVAGLTSFSFGEDDDCRYVMIFKKEFAPSDEELDS      120
SPAG7_Ref     QDSGQIKKKFQPMNKIERSILHDVVEVAGLTSFSFGEDDDCRYVMIFKKEFAPSDEELDS      120
*****

SPAG7_OT      YRRGEEWDPQKAEKRLKELAQEQEEAAQQGPPVVSPASDYKDKYSHLIGKGAAKDAA      180
SPAG7_OC      YRRGEEWDPQKAEKRLKELAQEQEEAAQQGPPVVSPASDYKDKYSHLIGKGAAKDAA      180
SPAG7_Ref     YRRGEEWDPQKAEKRLKELAQEQEEAAQQGPPVVSPASDYKDKYSHLIGKGAAKDAA      180
*****

SPAG7_OT      HMLQANKTYGCGEATVRLGVAGRGAWMWQEGSGMRYGFLGPPTLLSAPSARGQ      234
SPAG7_OC      HMLQANKTYGCVPVANKRDTRSIEEAMNEIRAKRRLRQSGEELPPTS-----      227
SPAG7_Ref     HMLQANKTYGCVPVANKRDTRSIEEAMNEIRAKRRLRQSGEELPPTS-----      227
*****          *
  
```

Ref: SPAG7

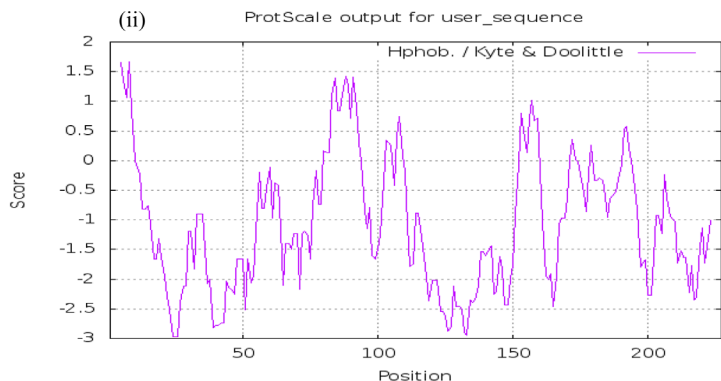

OC: SPAG7

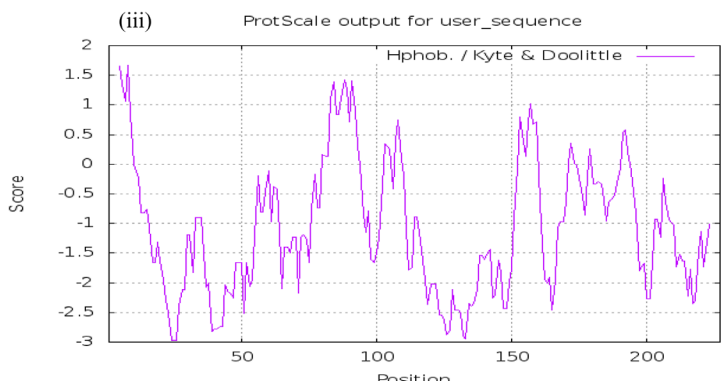

OT: SPAG7

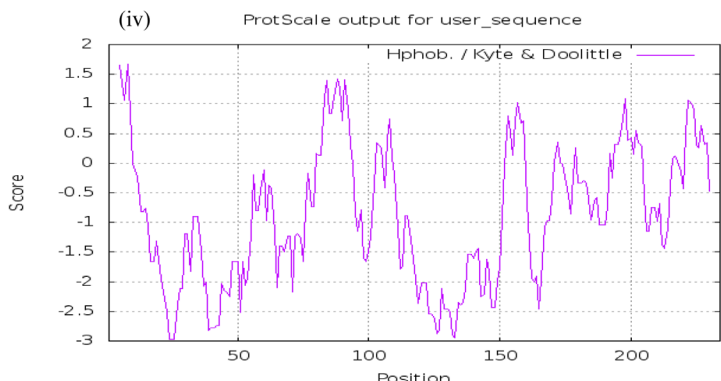

# E

(i)

CLUSTAL O(1.2.4) multiple sequence alignment

```

UCHL3_Ref      MEGQRWLPLEANPEVTNQFLKQLGLHPNWQFVDVYGMDELLSMVPRPVCVALLLFFITE 60
UCHL3_OC       MEGQRWLPLEANPEVTNQFLKQLGLHPNWQFVDVYGMDELLSMVPRPVCVALLLFFITE 60
UCHL3_OT       -----MDPELLSMVPRPVCVALLLFFITE 24
                *****

UCHL3_Ref      KYEVFRTEEEEEKIKSQGQDVTSSVYFMKQTI SNACGTIGLIHAIANNKDKMHFESGSLK 120
UCHL3_OC       KYEVFRTEEEEEKIKSQGQDVTSSVYFMKQTI SNACGTIGLIHAIANNKDKMHFESGSLK 120
UCHL3_OT       KYEVFRTEEEEEKIKSQGQDVTSSVYFMKQTI SNACGTIGLIHAIANNKDKMHFESGSLK 84
                *****

UCHL3_Ref      KFLEESVSMSPPEERARYLENYDAIRVTHETSAHEGQTE----- 158
UCHL3_OC       KFLEESVSMSPPEERARYLENYDAIRVTHETSAHEGQTE----- 158
UCHL3_OT       KFLEESVSMSPPEERARYLENYDAIRVTHETSAHEGQTESSSPSSSQPHSSHCRCKASSLC 144
                *****

UCHL3_Ref      -----APSIDEKVDLHFIALVHV 176
UCHL3_OC       -----APSIDEKVDLHFIALVHV 176
UCHL3_OT       HHASLPWVKRNHVGPAAKATSPSLRLRRWRPFLRLPSLGLHSVAFSIDEKVDLHFIALVHV 204
                *****

UCHL3_Ref      DGHLIELDGRKPPFINHGGETSDETLLEDAIEVCKKFMERDPDELRFNAIALSAA 230
UCHL3_OC       DGHLIELDGRKPPFINHGGETSDETLLEDAIEVCKKFMERDPDELRFNAIALSAA 230
UCHL3_OT       DGHLIELDGRKPPFINHGGETSDETLLEDAIEVCKKIMERDPDELRFNAIALSAA 258
                *****
    
```

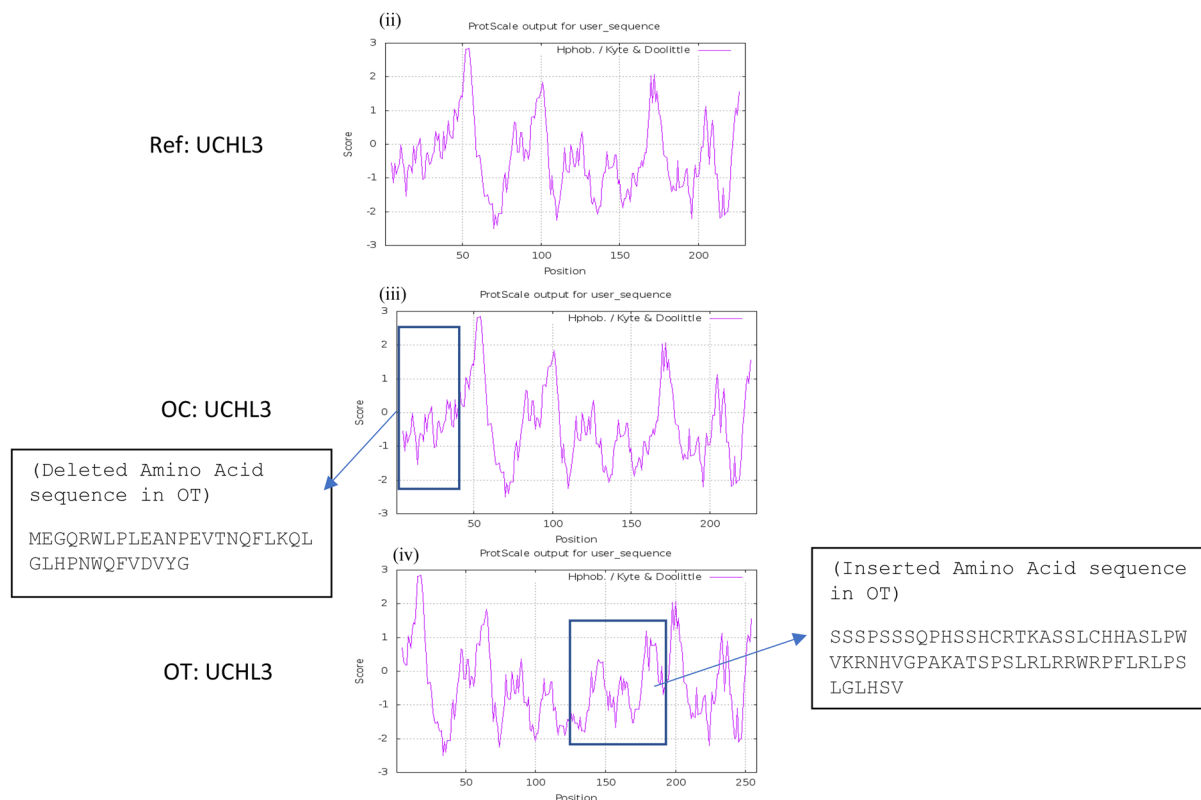

**Supplementary Figure 1:** (A) Analysis of the amino acid sequences of the IL37 wild-type and OT isoform. (i) The amino acid sequence of the OT was aligned with the IL37 wild-type by NCBI protein blast. Hydropathicity of the (ii) wild-type and (iii) the OT isoform was predicted by ProtParam and ProtScale, respectively. (B) Analysis of the amino acid sequences of RAB24 wild-type, OC and OT isoform. (i) The amino acid sequence of OC and OT isoform was aligned with the RAB24 wild-type by NCBI protein blast, and deletion of 45 amino acid sequence was found. Hydropathicity of (ii) wild-type, (iii) OC and (iv) OT isoform, (box indicates the deleted 45 AA) of RAB24 was predicted by ProtParam and ProtScale, respectively. (C) Analysis of the amino acid sequences of NAA10 wild-type, OC and OT isoform. (i) The amino acid sequence of the OC and OT isoform was aligned with the NAA10 wild-type by NCBI protein blast, and insertion of 69 amino acid sequence was found. Hydropathicity of (ii) wild-type, (iii) OC and (iv) OT isoform, box indicates the inserted 69 AA) of NAA10 was predicted by ProtParam and ProtScale, respectively. (D) Analysis of the amino acid sequences of SPAG7 wild-type, OC and OT isoform. (i) The amino acid sequence of the OC and OT isoform was aligned with the SPAG7 wild-type by NCBI protein blast.

Hydropathicity of (ii) wild-type, (iii) OC and (iv) OT isoform of SPAG7 was predicted by ProtParam and ProtScale, respectively. (E) Analysis of the amino acid sequences of UCHL3 wild-type, OC and OT isoform. (i) The amino acid sequence of the OC and OT isoform was aligned with the UCHL3 wild-type by NCBI protein blast, and insertion of 36 amino acid and deletion of 64 AA sequence was found (A). Hydropathicity of (ii) wild-type, (iii) OC and (iv) OT isoform, (box indicates the inserted and deleted AA) of UCHL3 was predicted by ProtParam and ProtScale, respectively.

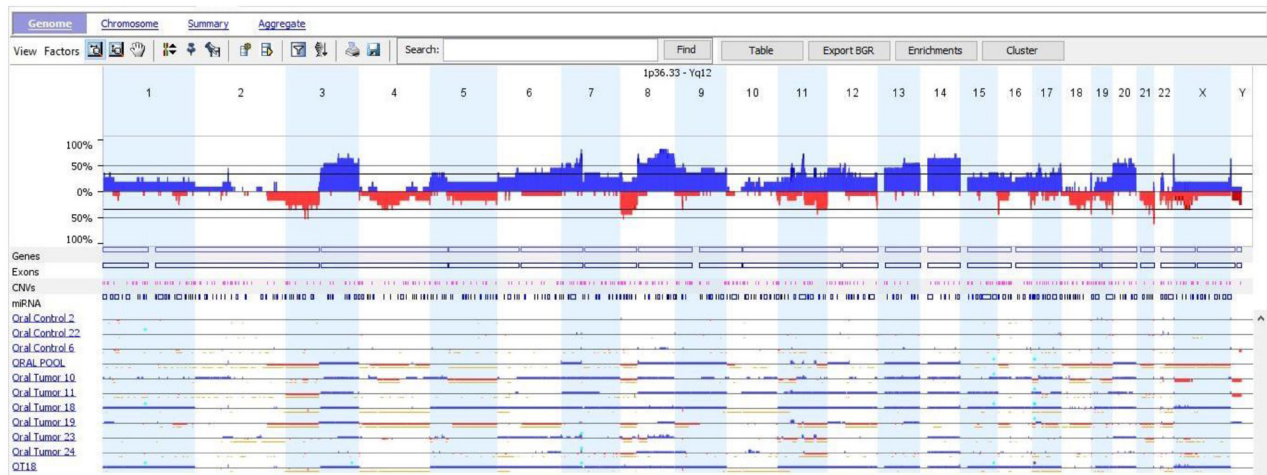

**Supplementary Figure 2:** Molecular karyogram of OT-10, OT-11, OT-18, OT-19, OT-23 and OT-24 tumor samples and OC-2, OC-6, and OC-22 control samples processed via OncoScan array and analyzed with tumor Scan (TuScan) and BioDiscovery's SNP-FASST2 algorithm using Nexus Express for OncoScan software version 7.5 (Biodiscovery, Inc., CA USA).

**Supplementary Table 1:** (A) Details of keratinized OSCC collected from different anatomical sites (buccal mucosa; tongue and alveolous) of oral cavity. Histopathological classification, Level of differentiation, and involvement of node have also been included. (B) Details of oral control samples collected from different anatomical sites. See Supplementary Table 1

**Supplementary Table 2:** Details of enzymes found in KEGG pathway database from Homo sapiens. See Supplementary Table 2

**Supplementary Table 3:** Identified differentially expressed (more than 2 fold) isoforms between high quality 20, 600 and 10, 637 FL isoform reads in OC and OT respectively through G-FOLD Tool using default parameters. See Supplementary Table 3

**Supplementary Table 4:** (A) Differential expression of 34 transcripts and five housekeeping genes in 42 tumour samples (15 histo-pathologically characterized formalin fixed paraffin embedded keratinized tumor samples and fresh 27 oral tumor samples as well as four control samples). (B) 25 most relevant pathways sorted by *p*-value of validated 34 transcripts in 42 tumor samples (15 histo-pathologically characterized FFPE keratinized). (C) Percentage Expression Fusion transcripts in 23 OT and 15 FFPE keratinized OSCC samples compared to 4 oral control samples. See Supplementary Table 4

**Supplementary Table 5: Validation of isoforms through Multiple alignment of identified and validated 33 novel full-length transcripts isoforms with RefSeq (NCBI Reference Sequence Database).** See Supplementary Table 5

**Supplementary Table 6: List of 33 full length novel transcript isoforms showing exonic-insertion, -deletion or -fusion in pooled-OC, pooled-OT samples and NM IDs.** See Supplementary Table 6

**Supplementary Table 7:** (A) Highly significant gene-level differentially expressed coding and non-coding transcript clusters between 16 OT and 4 OC-samples, using one-way between-subject ANOVA algorithm and default filtering criteria ( $Abs FC \geq 2$  and ANOVA *p*-value  $\leq 0.001$ ). (B) Highly significant (*p*-value  $\leq 0.001$ ) differential pathways at gene level between 16 OSCC and 4 Control samples. See Supplementary Table 7

**Supplementary Table 8:** (A) Physicochemical properties of the wild-type, Oral Control and Oral Tumor isoforms of IL37, RAB24, NAA10, SPAG7 and UCHL3. (B) Secondary structures of the IL37, RAB24, NAA10, SPAG7 and UCHL3 in wild-type, OC and OT samples. See Supplementary Table 8
